# Supplementary material for: Findings for iGlarLixi versus BIAsp 30 confirmed in groups of people with type 2 diabetes with different biomedical characteristics
Source: PubMed Central journal article supplement — Diabetes Obes Metab. 2022 Nov 23;25(3):656–63. doi: 10.1111/dom.14907 (PMC10099981; doi:10.1111/dom.14907), 2022-11-23
Supplement: DOM-25-656-s002.pdf [file DOM-25-656-s002.pdf]

## Supplementary

Supplementary table 1. Participant characteristics in subgroups determined by baseline characteristics (ITT population).

| Baseline subgroup                                  | Age, years  | Sex,<br>female,<br>% | Diabetes<br>duration,<br>years | Basal<br>insulin<br>dose, U/kg | HbA1c, %  | HbA1c,<br>mmol/mol | BMI,<br>kg/m <sup>2</sup> | Diabetic<br>nephropathy,<br>% | Daily insulin dose, % |           |
|----------------------------------------------------|-------------|----------------------|--------------------------------|--------------------------------|-----------|--------------------|---------------------------|-------------------------------|-----------------------|-----------|
|                                                    |             |                      |                                |                                |           |                    |                           |                               | <30 U/day             | ≥30 U/day |
| <b>Age, years</b>                                  |             |                      |                                |                                |           |                    |                           |                               |                       |           |
| <65 (n=573)                                        | 54.1 (7.7)  | 48.0                 | 11.0 (6.1)                     | 0.4 (0.1)                      | 8.6 (0.7) | 70.8 (7.4)         | 29.9 (5.0)                | 8.4                           | 36.1                  | 63.9      |
| ≥65 (n=314)                                        | 70.1 (4.1)  | 54.1                 | 16.7 (7.6)                     | 0.4 (0.1)                      | 8.5 (0.7) | 69.5 (7.2)         | 29.9 (4.7)                | 12.1                          | 36.3                  | 63.7      |
| <b>Duration of T2D, years</b>                      |             |                      |                                |                                |           |                    |                           |                               |                       |           |
| <10 (n=305)                                        | 54.9 (10.3) | 49.5                 | 5.6 (2.4)                      | 0.4 (0.1)                      | 8.5 (0.7) | 69.8 (7.1)         | 30.2 (5.3)                | 7.9                           | 39.3                  | 60.7      |
| ≥10 (n=582)                                        | 62.4 (9.1)  | 50.5                 | 16.8 (5.8)                     | 0.4 (0.1)                      | 8.6 (0.7) | 70.6 (7.3)         | 29.7 (4.7)                | 10.7                          | 34.5                  | 65.5      |
| <b>Basal insulin dose,<br/>U/day</b>               |             |                      |                                |                                |           |                    |                           |                               |                       |           |
| <30 (n=316)                                        | 59.6 (10.5) | 47.8                 | 12.3 (7.1)                     | 0.3 (0.1)                      | 8.6 (0.7) | 70.0 (7.7)         | 28.9 (4.6)                | 26.3                          | 99.4                  | 1.2       |
| ≥30 (n=571)                                        | 59.9 (10.0) | 51.5                 | 13.4 (7.3)                     | 0.5 (0.1)                      | 8.6 (0.6) | 70.5 (7.0)         | 30.4 (5.0)                | 28.5                          | 0.6                   | 98.8      |
| <b>HbA1c, % (mmol/mol)</b>                         |             |                      |                                |                                |           |                    |                           |                               |                       |           |
| 7.5–8.0 % (n=238)<br>(58–64 mmol/mol)              | 60.7 (10.5) | 50.8                 | 13.1 (7.4)                     | 0.4 (0.2)                      | 7.8 (0.2) | 61.6 (1.9)         | 30.1 (5.0)                | 8.8                           | 40.3                  | 59.7      |
| >8.0–9.0 % (n=403)<br>(>64–75 mmol/mol)            | 59.9 (10.1) | 47.6                 | 12.7 (7.0)                     | 0.4 (0.1)                      | 8.5 (0.3) | 69.7 (3.0)         | 30.0 (4.9)                | 11.7                          | 33.3                  | 66.7      |
| >9.0–10.0 % (n=246)<br>(>75–86 mmol/mol)           | 58.7 (10.0) | 53.7                 | 13.4 (7.4)                     | 0.4 (0.1)                      | 9.5 (0.3) | 79.8 (3.0)         | 29.5 (4.8)                | 7.3                           | 37.0                  | 63.0      |
| <b>BMI,<sup>a</sup> kg/m<sup>2</sup></b>           |             |                      |                                |                                |           |                    |                           |                               |                       |           |
| <25 (n=148)                                        | 59.2 (10.1) | 41.9                 | 12.6 (8.1)                     | 0.5 (0.2)                      | 8.6 (0.7) | 70.0 (7.2)         | 23.2 (1.3)                | 6.8                           | 43.9                  | 56.1      |
| 25 to <30 (n=345)                                  | 60.2 (10.2) | 46.7                 | 13.7 (7.1)                     | 0.4 (0.1)                      | 8.6 (0.7) | 70.7 (7.3)         | 27.5 (1.4)                | 9.6                           | 39.1                  | 60.9      |
| 30 to <35 (n=237)                                  | 60.4 (9.9)  | 51.5                 | 13.2 (6.7)                     | 0.4 (0.1)                      | 8.6 (0.7) | 69.9 (7.8)         | 32.4 (1.5)                | 12.2                          | 34.6                  | 65.4      |
| ≥35 (n=156)                                        | 58.8 (10.2) | 63.5                 | 11.6 (7.3)                     | 0.4 (0.1)                      | 8.6 (0.7) | 70.0 (7.1)         | 37.6 (1.5)                | 9.0                           | 25.0                  | 75.0      |
| <b>eGFR,<sup>b</sup> mL/min/1.73-m<sup>2</sup></b> |             |                      |                                |                                |           |                    |                           |                               |                       |           |
| ≥90 (n=318)                                        | 55.2 (10.9) | 51.3                 | 11.5 (7.2)                     | 0.4 (0.1)                      | 8.6 (0.7) | 70.6 (7.5)         | 29.5 (4.9)                | 5.3                           | 39.9                  | 60.1      |
| 60 to <90 (n=436)                                  | 62.0 (8.6)  | 49.5                 | 13.4 (7.0)                     | 0.4 (0.1)                      | 8.6 (0.7) | 70.3 (7.1)         | 30.1 (5.0)                | 8.3                           | 32.8                  | 67.2      |
| <60 (n=106)                                        | 65.3 (8.1)  | 54.7                 | 15.2 (7.2)                     | 0.4 (0.1)                      | 8.5 (0.7) | 69.6 (7.1)         | 29.7 (4.5)                | 28.3                          | 35.8                  | 64.2      |

Mean (SD) unless otherwise stated.

<sup>a</sup>For one patient, BMI value was missing at baseline. <sup>b</sup>For 27 patients, eGFR values were missing at baseline.

BMI, body mass index; eGFR, estimated glomerular filtration rate; ITT, intent to treat; kg, kilogram; SD, standard deviation; T2D, type 2 diabetes; U, units.

Supplementary table 2. Change in HbA1c from baseline to Week 26 by baseline characteristics subgroups (ITT population).

| HbA1c, %                                     |                     |                  |                    |                  |                                               |                  |                             |                       |
|----------------------------------------------|---------------------|------------------|--------------------|------------------|-----------------------------------------------|------------------|-----------------------------|-----------------------|
|                                              | Baseline, mean (SD) |                  | Week 26, mean (SD) |                  | Change from baseline to Week 26, LS mean (SE) |                  | LS mean difference (95% CI) | Heterogeneity p-value |
|                                              | iGlarLixi (n=443)   | BIAsp 30 (n=444) | iGlarLixi (n=443)  | BIAsp 30 (n=444) | iGlarLixi (n=443)                             | BIAsp 30 (n=444) |                             |                       |
| <b>Age subgroups</b>                         |                     |                  |                    |                  |                                               |                  |                             |                       |
| <65 years (n=573)                            | 8.7 (0.7)           | 8.6 (0.7)        | 7.3 (1.1)          | 7.5 (1.0)        | -1.3 (0.1)                                    | -1.1 (0.1)       | -0.3 (-0.4, -0.1)           | 0.991                 |
| ≥65 years (n=314)                            | 8.5 (0.7)           | 8.5 (0.6)        | 7.3 (1.0)          | 7.5 (1.0)        | -1.3 (0.1)                                    | -1.0 (0.1)       | -0.3 (-0.5, -0.0)           |                       |
| <b>Diabetes duration subgroups</b>           |                     |                  |                    |                  |                                               |                  |                             |                       |
| <10 years (n=305)                            | 8.6 (0.7)           | 8.5 (0.7)        | 7.2 (1.1)          | 7.5 (1.1)        | -1.4 (0.1)                                    | -1.1 (0.1)       | -0.3 (-0.5, -0.1)           | 0.577                 |
| ≥10 years (n=582)                            | 8.6 (0.7)           | 8.6 (0.7)        | 7.3 (1.0)          | 7.5 (1.0)        | -1.3 (0.1)                                    | -1.1 (0.1)       | -0.2 (-0.4, -0.0)           |                       |
| <b>Basal insulin dose subgroups</b>          |                     |                  |                    |                  |                                               |                  |                             |                       |
| <30 U/day (n=316)                            | 8.6 (0.7)           | 8.5 (0.7)        | 7.3 (1.0)          | 7.5 (1.0)        | -1.4 (0.3)                                    | -1.2 (0.3)       | -0.3 (-0.5, -0.0)           | 0.960                 |
| ≥30 U/day (n=571)                            | 8.6 (0.7)           | 8.6 (0.6)        | 7.3 (1.1)          | 7.5 (1.0)        | -1.3 (0.1)                                    | -1.0 (0.2)       | -0.2 (-0.4, -0.1)           |                       |
| <b>HbA1c subgroups</b>                       |                     |                  |                    |                  |                                               |                  |                             |                       |
| 7.5–8.0 % (n=238)                            | 7.8 (0.2)           | 7.8 (0.2)        | 7.0 (0.9)          | 7.1 (0.8)        | -1.2 (0.1)                                    | -1.1 (0.2)       | -0.1 (-0.4, 0.1)            | 0.278                 |
| >8.0–9.0 % (n=403)                           | 8.5 (0.3)           | 8.5 (0.3)        | 7.1 (1.0)          | 7.5 (1.0)        | -1.4 (0.1)                                    | -1.1 (0.1)       | -0.4 (-0.6, -0.2)           |                       |
| >9.0–10.0 % (n=246)                          | 9.5 (0.3)           | 9.5 (0.3)        | 7.7 (1.2)          | 7.9 (1.1)        | -1.3 (0.2)                                    | -1.1 (0.2)       | -0.2 (-0.4, 0.1)            |                       |
| <b>BMI subgroups</b>                         |                     |                  |                    |                  |                                               |                  |                             |                       |
| <25 kg/m <sup>2</sup> (n=148)                | 8.5 (0.7)           | 8.6 (0.6)        | 7.2 (1.1)          | 7.4 (0.9)        | -1.4 (0.1)                                    | -1.2 (0.1)       | -0.2 (-0.5, 0.2)            | 0.599                 |
| 25–<30 kg/m <sup>2</sup> (n=345)             | 8.7 (0.7)           | 8.6 (0.7)        | 7.2 (0.9)          | 7.5 (1.0)        | -1.4 (0.1)                                    | -1.1 (0.1)       | -0.4 (-0.6, -0.1)           |                       |
| 30–<35 kg/m <sup>2</sup> (n=237)             | 8.6 (0.6)           | 8.6 (0.7)        | 7.4 (1.1)          | 7.5 (0.9)        | -1.2 (0.1)                                    | -1.0 (0.1)       | -0.2 (-0.4, 0.1)            |                       |
| ≥35 kg/m <sup>2</sup> (n=156)                | 8.6 (0.7)           | 8.6 (0.6)        | 7.4 (1.1)          | 7.6 (1.2)        | -1.3 (0.1)                                    | -1.0 (0.1)       | -0.3 (-0.6, 0.1)            |                       |
| <b>eGFR subgroups</b>                        |                     |                  |                    |                  |                                               |                  |                             |                       |
| ≥90 mL/min/1.73-m <sup>2</sup> (n=318)       | 8.6 (0.7)           | 8.6 (0.7)        | 7.3 (1.2)          | 7.5 (1.0)        | -1.2 (0.1)                                    | -1.1 (0.1)       | -0.1 (-0.3, 0.1)            | 0.308                 |
| 60 to <90 mL/min/1.73-m <sup>2</sup> (n=436) | 8.6 (0.7)           | 8.5 (0.6)        | 7.2 (0.9)          | 7.5 (1.0)        | -1.4 (0.1)                                    | -1.1 (0.1)       | -0.3 (-0.5, -0.1)           |                       |
| <60 mL/min/1.73-m <sup>2</sup> (n=106)       | 8.5 (0.7)           | 8.6 (0.5)        | 7.2 (1.1)          | 7.4 (1.0)        | -1.4 (0.2)                                    | -1.1 (0.2)       | -0.3 (-0.7, 0.1)            |                       |

| HbA1c, mmol/mol                              |                     |                  |                    |                  |                                               |                  |                             |                       |
|----------------------------------------------|---------------------|------------------|--------------------|------------------|-----------------------------------------------|------------------|-----------------------------|-----------------------|
|                                              | Baseline, mean (SD) |                  | Week 26, mean (SD) |                  | Change from baseline to Week 26, LS mean (SE) |                  | LS mean difference (95% CI) | Heterogeneity p-value |
|                                              | iGlarLixi (n=443)   | BIAsp 30 (n=444) | iGlarLixi (n=443)  | BIAsp 30 (n=444) | iGlarLixi (n=443)                             | BIAsp 30 (n=444) |                             |                       |
| <b>Age subgroups</b>                         |                     |                  |                    |                  |                                               |                  |                             |                       |
| <65 years (n=573)                            | 71.1 (7.3)          | 70.5 (7.2)       | 55.8 (11.7)        | 58.1 (10.8)      | -14.6 (0.7)                                   | -12.0 (0.7)      | -2.7 (-4.6, -0.8)           | 0.991                 |
| ≥65 years (n=314)                            | 69.7 (7.4)          | 69.4 (6.9)       | 55.8 (11.4)        | 58.5 (10.9)      | -14.0 (0.9)                                   | -11.3 (1.0)      | -2.7 (-5.4, -0.1)           |                       |
| <b>Diabetes duration subgroups</b>           |                     |                  |                    |                  |                                               |                  |                             |                       |
| <10 years (n=305)                            | 70.3 (7.1)          | 69.4 (7.2)       | 55.0 (12.5)        | 57.9 (11.6)      | -14.9 (0.9)                                   | -11.6 (1.0)      | -3.3 (-5.8, -0.7)           | 0.577                 |
| ≥10 years (n=582)                            | 70.7 (7.5)          | 70.5 (7.1)       | 56.3 (11.0)        | 58.3 (10.4)      | -14.2 (0.7)                                   | -11.8 (0.7)      | -2.4 (-4.3, -0.4)           |                       |
| <b>Basal insulin dose subgroups</b>          |                     |                  |                    |                  |                                               |                  |                             |                       |
| <30 U/day (n=316)                            | 70.4 (7.8)          | 69.7 (7.5)       | 55.8 (11.0)        | 58.1 (10.4)      | -15.5 (2.7)                                   | -12.8 (2.7)      | -2.7 (-5.4, -0.1)           | 0.960                 |
| ≥30 U/day (n=571)                            | 70.7 (7.1)          | 70.4 (6.9)       | 55.8 (11.8)        | 58.3 (11.0)      | -13.9 (1.5)                                   | -11.1 (1.6)      | -2.6 (-4.6, -0.8)           |                       |
| <b>HbA1c subgroups</b>                       |                     |                  |                    |                  |                                               |                  |                             |                       |
| 7.5–8.0 % (n=238)                            | 61.5 (1.9)          | 61.7 (1.9)       | 52.9 (9.4)         | 54.4 (8.5)       | -13.3 (1.5)                                   | -11.9 (1.6)      | -1.4 (-4.3, 1.4)            | 0.278                 |
| >8.0–9.0 % (n=403)                           | 69.8 (3.0)          | 69.7 (3.1)       | 54.1 (10.6)        | 57.9 (10.7)      | -15.5 (0.8)                                   | -11.5 (0.9)      | -4.0 (-6.3, -1.7)           |                       |
| >9.0–10.0 % (n=246)                          | 79.8 (3.0)          | 79.8 (3.0)       | 60.9 (12.9)        | 62.8 (11.5)      | -13.8 (1.6)                                   | -11.9 (1.6)      | -1.7 (-4.6, 1.0)            |                       |
| <b>BMI subgroups</b>                         |                     |                  |                    |                  |                                               |                  |                             |                       |
| <25 kg/m <sup>2</sup> (n=148)                | 69.6 (7.5)          | 70.3 (6.9)       | 55.2 (12.4)        | 57.2 (10.1)      | -15.0 (1.4)                                   | -13.3 (1.3)      | -1.7 (-5.3, 1.9)            | 0.599                 |
| 25–<30 kg/m <sup>2</sup> (n=345)             | 71.2 (7.5)          | 70.2 (7.1)       | 54.8 (10.2)        | 58.1 (10.5)      | -15.7 (0.8)                                   | -11.7 (0.9)      | -3.96 (-6.4, -1.5)          |                       |
| 30–<35 kg/m <sup>2</sup> (n=237)             | 70.6 (7.0)          | 69.9 (7.8)       | 56.9 (12.4)        | 58.5 (10.3)      | -12.9 (1.0)                                   | -11.2 (1.1)      | -1.69 (-4.6, 1.2)           |                       |
| ≥35 kg/m <sup>2</sup> (n=156)                | 69.9 (7.5)          | 70.2 (6.8)       | 56.8 (12.2)        | 59.2 (12.7)      | -13.8 (1.4)                                   | -10.9 (1.3)      | -2.89 (-6.5, 0.7)           |                       |
| <b>eGFR subgroups</b>                        |                     |                  |                    |                  |                                               |                  |                             |                       |
| ≥90 mL/min/1.73-m <sup>2</sup> (n=318)       | 70.6 (7.3)          | 70.7 (7.8)       | 56.8 (12.6)        | 58.3 (10.7)      | -13.4 (0.9)                                   | -12.3 (0.9)      | -1.2 (-3.6, 1.3)            | 0.308                 |
| 60 to <90 mL/min/1.73-m <sup>2</sup> (n=436) | 70.9 (7.2)          | 69.7 (6.9)       | 55.1 (10.3)        | 58.1 (11.0)      | -15.3 (0.8)                                   | -11.5 (0.8)      | -3.7 (-5.9, -1.6)           |                       |
| <60 mL/min/1.73-m <sup>2</sup> (n=106)       | 69.4 (8.1)          | 70.0 (5.7)       | 54.9 (12.5)        | 57.3 (10.3)      | -14.9 (1.6)                                   | -11.7 (1.7)      | -3.2 (-7.8, 1.5)            |                       |

BIAsp, biphasic insulin aspart; CI confidence interval; eGFR, estimated glomerular filtration rate; FRC, fixed-ratio combination; iGlarLixi, FRC of insulin glargine 100 U/mL and the glucagon-like peptide-1 receptor agonist, lixisenatide; ITT, intent to treat; LS, least squares; SD, standard deviation; SE, standard error.

Supplementary table 3. Change in body weight from baseline to Week 26 by baseline characteristics subgroups (ITT population).

| Body Weight, kg                              |                     |                  |                    |                  |                                               |                  |                             |                       |
|----------------------------------------------|---------------------|------------------|--------------------|------------------|-----------------------------------------------|------------------|-----------------------------|-----------------------|
|                                              | Baseline, mean (SD) |                  | Week 26, mean (SD) |                  | Change from baseline to Week 26, LS mean (SE) |                  | LS mean difference (95% CI) | Heterogeneity p-value |
|                                              | iGlarLixi (n=443)   | BIAsp 30 (n=444) | iGlarLixi (n=443)  | BIAsp 30 (n=444) | iGlarLixi (n=443)                             | BIAsp 30 (n=444) |                             |                       |
| <b>Age subgroups</b>                         |                     |                  |                    |                  |                                               |                  |                             |                       |
| <65 years (n=573)                            | 81.8 (17.6)         | 83.0 (19.3)      | 81.3 (17.7)        | 84.1 (19.9)      | -0.4 (0.2)                                    | 1.2 (0.2)        | -1.7 (-2.2, -1.1)           | 0.188                 |
| ≥65 years (n=314)                            | 78.8 (14.5)         | 80.7 (16.6)      | 78.3 (14.4)        | 82.0 (17.2)      | -0.8 (0.3)                                    | 1.4 (0.3)        | -2.2 (-2.9, -1.5)           |                       |
| <b>Diabetes duration subgroups</b>           |                     |                  |                    |                  |                                               |                  |                             |                       |
| <10 years (n=305)                            | 81.9 (19.0)         | 83.9 (20.3)      | 82.0 (19.0)        | 85.0 (20.8)      | 0.0 (0.3)                                     | 1.3 (0.3)        | -1.3 (-2.0, -0.6)           | 0.052                 |
| ≥10 years (n=582)                            | 80.1 (15.1)         | 81.3 (17.4)      | 79.3 (15.2)        | 82.5 (18.0)      | -0.9 (0.2)                                    | 1.3 (0.2)        | -2.2 (-2.7, -1.6)           |                       |
| <b>Basal insulin dose subgroups</b>          |                     |                  |                    |                  |                                               |                  |                             |                       |
| <30 U/day (n=316)                            | 78.9 (16.1)         | 77.8 (17.2)      | 78.4 (16.1)        | 79.3 (17.6)      | -1.7 (0.7)                                    | 0.5 (0.7)        | -2.1 (-2.8, -1.4)           | 0.362                 |
| ≥30 U/day (n=571)                            | 81.7 (16.7)         | 84.6 (18.7)      | 81.2 (16.8)        | 85.6 (19.4)      | 0.1 (0.4)                                     | 1.8 (0.4)        | -1.7 (-2.2, -1.2)           |                       |
| <b>HbA1c subgroups</b>                       |                     |                  |                    |                  |                                               |                  |                             |                       |
| 7.5–8.0 % (n=238)                            | 80.3 (17.4)         | 85.4 (20.2)      | 79.3 (17.2)        | 86.8 (20.9)      | -0.9 (0.4)                                    | 1.6 (0.4)        | -2.4 (-3.2, -1.6)           | 0.243                 |
| >8.0–9.0 % (n=403)                           | 82.3 (16.6)         | 81.9 (16.8)      | 81.7 (16.8)        | 82.8 (17.5)      | -0.6 (0.3)                                    | 1.0 (0.3)        | -1.6 (-2.2, -1.0)           |                       |
| >9.0–10.0 % (n=246)                          | 78.8 (15.6)         | 79.4 (19.1)      | 78.9 (15.8)        | 80.6 (19.1)      | -0.3 (0.3)                                    | 1.6 (0.3)        | -1.8 (-2.6, -1.1)           |                       |
| <b>BMI subgroups</b>                         |                     |                  |                    |                  |                                               |                  |                             |                       |
| <25 kg/m <sup>2</sup> (n=148)                | 62.0 (8.7)          | 61.7 (8.4)       | 62.0 (9.0)         | 63.0 (8.8)       | 0.2 (0.4)                                     | 1.7 (0.4)        | -1.5(-2.5, -0.6)            | 0.609                 |
| 25–<30 kg/m <sup>2</sup> (n=345)             | 75.0 (10.0)         | 74.9 (10.2)      | 74.4 (10.1)        | 76.1 (10.9)      | -0.5 (0.2)                                    | 1.2 (0.3)        | -1.7 (-2.4, -1.1)           |                       |
| 30–<35 kg/m <sup>2</sup> (n=237)             | 88.0 (11.2)         | 90.1 (12.3)      | 87.4 (11.7)        | 91.6 (13.3)      | -0.8 (0.3)                                    | 1.5 (0.3)        | -2.3 (-3.1, -1.5)           |                       |
| ≥35 kg/m <sup>2</sup> (n=156)                | 102.2 (14.7)        | 103.9 (15.5)     | 101.4 (15.3)       | 105.1 (16.8)     | -1.0 (0.4)                                    | 0.8 (0.4)        | -1.8 (-2.8, -0.8)           |                       |
| <b>eGFR subgroups</b>                        |                     |                  |                    |                  |                                               |                  |                             |                       |
| ≥90 mL/min/1.73-m <sup>2</sup> (n=318)       | 77.3 (15.4)         | 81.7 (19.9)      | 77.4 (15.4)        | 83.4 (20.6)      | -0.2 (0.3)                                    | 1.6 (0.2)        | -1.7 (-2.4, -1.1)           | 0.300                 |
| 60 to <90 mL/min/1.73-m <sup>2</sup> (n=436) | 82.5 (16.7)         | 82.7 (18.3)      | 81.8 (16.7)        | 83.5 (18.7)      | -0.6 (0.2)                                    | 1.1 (0.2)        | -1.7 (-2.3, -1.1)           |                       |
| <60 mL/min/1.73-m <sup>2</sup> (n=106)       | 79.4 (15.6)         | 80.9 (13.9)      | 77.8 (16.4)        | 81.6 (14.2)      | -1.6 (0.4)                                    | 1.1 (0.5)        | -2.7 (-3.9, -1.5)           |                       |

BIAsp, biphasic insulin aspart; CI confidence interval; eGFR, estimated glomerular filtration rate; FRC, fixed-ratio combination; iGlarLixi, FRC of insulin glargine 100 U/mL and the glucagon-like peptide-1 receptor agonist, lixisenatide; ITT, intent to treat; LS, least squares; SD, standard deviation; SE, standard error.

Supplementary table 4. Change in insulin dose from baseline to Week 26 by baseline characteristics subgroups (ITT population).

|                                              | Total daily insulin dose, U/day |                     |                      |                     |                                                  |                     | LS mean difference<br>(95% CI) | Heterogeneity<br>p-value |
|----------------------------------------------|---------------------------------|---------------------|----------------------|---------------------|--------------------------------------------------|---------------------|--------------------------------|--------------------------|
|                                              | Baseline, mean (SD)             |                     | Week 26, mean (SD)   |                     | Change from baseline to Week<br>26, LS mean (SE) |                     |                                |                          |
|                                              | iGlarLixi<br>(n=443)            | BIAsp 30<br>(n=444) | iGlarLixi<br>(n=443) | BIAsp 30<br>(n=444) | iGlarLixi<br>(n=443)                             | BIAsp 30<br>(n=444) |                                |                          |
| <b>Age subgroups</b>                         |                                 |                     |                      |                     |                                                  |                     |                                |                          |
| <65 years (n=573)                            | 26.4 (5.9)                      | 33.7 (11.3)         | 39.1 (13.5)          | 54.2 (27.6)         | 12.9 (11.2)                                      | 24.8 (17.5)         | -11.9 (-47.4, 23.6)            | 0.991                    |
| ≥65 years (n=314)                            | 26.5 (6.8)                      | 33.2 (10.5)         | 36.6 (14.6)          | 53.4 (26.8)         | 10.7 (19.2)                                      | 22.9 (10.6)         | -12.2 (-48.9, 24.4)            |                          |
| <b>Diabetes duration subgroups</b>           |                                 |                     |                      |                     |                                                  |                     |                                |                          |
| <10 years (n=305)                            | 26.2 (6.5)                      | 32.3 (10.8)         | 38.6 (14.4)          | 54.5 (28.3)         | 11.7 (16.7)                                      | 26.2 (20.0)         | -14.5 (-49.5, 20.4)            | 0.804                    |
| ≥10 years (n=582)                            | 26.5 (6.1)                      | 34.2 (11.1)         | 38.0 (13.7)          | 53.6 (26.8)         | 12.4 (12.7)                                      | 23.1 (11.6)         | -10.8 (-40.6, 19.1)            |                          |
| <b>Basal insulin dose subgroups</b>          |                                 |                     |                      |                     |                                                  |                     |                                |                          |
| <30 U/day (n=316)                            | 20.2 (2.8)                      | 23.4 (4.7)          | 30.7 (11.7)          | 40.4 (20.8)         | 4.7 (35.0)                                       | 15.4 (37.9)         | -10.7 (-50.5, 29.2)            | 0.909                    |
| ≥30 U/day (n=571)                            | 29.9 (4.7)                      | 39.1 (9.4)          | 42.4 (13.4)          | 61.4 (27.7)         | 16.0 (23.3)                                      | 29.3 (21.3)         | -13.3 (-46.7, 20.1)            |                          |
| <b>HbA1c subgroups</b>                       |                                 |                     |                      |                     |                                                  |                     |                                |                          |
| 7.5–8.0 % (n=238)                            | 25.4 (5.8)                      | 31.9 (10.9)         | 34.7 (13.9)          | 50.1 (22.9)         | 10.6 (17.2)                                      | 23.0 (14.1)         | -12.4 (-55.3, 30.6)            | 1.000                    |
| >8.0–9.0 % (n=403)                           | 27.0 (6.5)                      | 34.2 (10.8)         | 39.6 (14.1)          | 55.3 (29.2)         | 12.1 (15.5)                                      | 24.0 (23.0)         | -12.0 (-50.9, 27.0)            |                          |
| >9.0–10.0 % (n=246)                          | 26.6 (6.2)                      | 34.1 (11.5)         | 39.4 (13.3)          | 55.6 (27.9)         | 13.5 (14.7)                                      | 25.9 (15.2)         | -12.3 (-45.6, 20.9)            |                          |
| <b>BMI subgroups</b>                         |                                 |                     |                      |                     |                                                  |                     |                                |                          |
| <25 kg/m <sup>2</sup> (n=148)                | 25.9 (5.1)                      | 30.9 (9.9)          | 34.5 (11.9)          | 48.9 (22.4)         | 7.1 (16.2)                                       | 18.5 (19.2)         | -11.4 (-47.4, 24.5)            | 0.994                    |
| 25–<30 kg/m <sup>2</sup> (n=345)             | 26.0 (6.4)                      | 33.0 (10.1)         | 36.0 (13.0)          | 50.9 (23.3)         | 10.1 (15.0)                                      | 21.8 (17.2)         | -11.7 (-47.0, 23.6)            |                          |
| 30–<35 kg/m <sup>2</sup> (n=237)             | 27.1 (6.9)                      | 33.9 (11.7)         | 39.7 (14.7)          | 57.6 (33.4)         | 13.5 (18.8)                                      | 29.8 (14.3)         | -16.3 (-60.2, 27.6)            |                          |
| ≥35 kg/m <sup>2</sup> (n=156)                | 27.0 (5.4)                      | 36.6 (12.2)         | 45.5 (14.1)          | 59.5 (28.5)         | 18.5 (17.0)                                      | 28.2 (17.2)         | -9.7 (-56.3, 37.0)             |                          |
| <b>eGFR subgroups</b>                        |                                 |                     |                      |                     |                                                  |                     |                                |                          |
| ≥90 mL/min/1.73-m <sup>2</sup> (n=318)       | 26.4 (6.3)                      | 31.6 (10.8)         | 38.5 (13.4)          | 52.2 (25.7)         | 11.8 (17.6)                                      | 24.6 (15.3)         | -12.8 (-50.0, 24.4)            | 0.999                    |
| 60 to <90 mL/min/1.73-m <sup>2</sup> (n=436) | 26.2 (6.2)                      | 34.7 (10.4)         | 38.9 (13.7)          | 55.8 (27.2)         | 12.5 (10.5)                                      | 25.0 (11.5)         | -12.5 (-39.7, 14.8)            |                          |
| <60 mL/min/1.73-m <sup>2</sup> (n=106)       | 27.9 (5.8)                      | 32.2 (10.5)         | 34.8 (16.3)          | 49.5 (27.1)         | 9.9 (32.2)                                       | 21.5 (31.9)         | -11.6 (-82.5, 59.2)            |                          |

BIAsp, biphasic insulin aspart; CI confidence interval; eGFR, estimated glomerular filtration rate; FRC, fixed-ratio combination; iGlarLixi, FRC of insulin glargine 100 U/mL and the glucagon-like peptide-1 receptor agonist, lixisenatide; ITT, intent to treat; LS, least squares; SD, standard deviation; SE, standard error.

Supplementary table 5. Incidence and rate of hypoglycaemia ADA Level 2<sup>a</sup> by baseline characteristics subgroups (safety population).

|                                              | Incidence, % (n) |           | OR (95% CI)       | Heterogeneity<br>p-value | Rate per participant year |          | RR (95% CI)       | Heterogeneity<br>p-value |
|----------------------------------------------|------------------|-----------|-------------------|--------------------------|---------------------------|----------|-------------------|--------------------------|
|                                              | iGlarLixi        | BIAsp 30  |                   |                          | iGlarLixi                 | BIAsp 30 |                   |                          |
| <b>Age subgroups</b>                         |                  |           |                   |                          |                           |          |                   |                          |
| Number of participants                       | 442              | 441       |                   |                          | 442                       | 441      |                   |                          |
| <65 years (n=572)                            | 5.0 (14)         | 11.6 (34) | 0.40 (0.21, 0.77) | 0.665                    | 0.11                      | 0.49     | 0.23 (0.10, 0.49) | 0.102                    |
| ≥65 years (n=311)                            | 8.6 (14)         | 15.5 (23) | 0.50 (0.24, 1.01) |                          | 0.51                      | 0.69     | 0.58 (0.25, 1.35) |                          |
| <b>Diabetes duration subgroups</b>           |                  |           |                   |                          |                           |          |                   |                          |
| Number of participants                       | 442              | 441       |                   |                          | 442                       | 441      |                   |                          |
| <10 years (n=303)                            | 4.6 (7)          | 7.3 (11)  | 0.64 (0.24, 1.71) | 0.408                    | 0.14                      | 0.34     | 0.34 (0.12, 0.97) | 0.722                    |
| ≥10 years (n=580)                            | 7.2 (21)         | 15.9 (46) | 0.40 (0.23, 0.69) |                          | 0.31                      | 0.67     | 0.42 (0.22, 0.82) |                          |
| <b>Basal insulin dose subgroups</b>          |                  |           |                   |                          |                           |          |                   |                          |
| Number of participants                       | 442              | 441       |                   |                          | 442                       | 441      |                   |                          |
| <30 U/day (n=313)                            | 9.6 (15)         | 14.7 (23) | 0.62 (0.31, 1.24) | 0.248                    | 0.50                      | 0.61     | 0.92 (0.40, 2.13) | 0.011                    |
| ≥30 U/day (n=570)                            | 4.6 (13)         | 11.9 (34) | 0.35 (0.18, 0.68) |                          | 0.11                      | 0.53     | 0.21 (0.10, 0.45) |                          |
| <b>HbA1c subgroups</b>                       |                  |           |                   |                          |                           |          |                   |                          |
| Number of participants                       | 442              | 441       |                   |                          |                           |          |                   |                          |
| 7.5–8.0 % (n=238)                            | 8.5 (10)         | 10.0 (12) | 0.84 (0.34, 2.03) | 0.275                    | 0.32                      | 0.40     | 0.72 (0.25, 2.08) | 0.407                    |
| >8.0–9.0 % (n=401)                           | 5.7 (11)         | 15.4 (32) | 0.33 (0.16, 0.68) |                          | 0.27                      | 0.67     | 0.37 (0.16, 0.85) |                          |
| >9.0–10.0 % (n=244)                          | 5.3 (7)          | 11.5 (13) | 0.43 (0.16, 1.11) |                          | 0.16                      | 0.52     | 0.26 (0.09, 0.79) |                          |
| <b>BMI subgroups<sup>b</sup></b>             |                  |           |                   |                          |                           |          |                   |                          |
| Number of participants                       | 441              | 441       |                   |                          | 441                       | 441      |                   |                          |
| <25 kg/m <sup>2</sup> (n=147)                | 10.1 (7)         | 19.2 (15) | 0.46 (0.18, 1.22) | 0.803                    | 0.31                      | 0.86     | 0.27 (0.07, 0.97) | 0.707                    |
| 25–<30 kg/m <sup>2</sup> (n=344)             | 7.8 (14)         | 14.0 (23) | 0.52 (0.25, 1.04) |                          | 0.32                      | 0.62     | 0.48 (0.21, 1.10) |                          |
| 30–<35 kg/m <sup>2</sup> (n=236)             | 3.2 (4)          | 10.8 (12) | 0.27 (0.08, 0.86) |                          | 0.21                      | 0.35     | 0.54 (0.17, 1.72) |                          |
| ≥35 kg/m <sup>2</sup> (n=155)                | 4.5 (3)          | 8.0 (7)   | 0.55 (0.14, 2.24) |                          | 0.09                      | 0.42     | 0.22 (0.04, 1.10) |                          |
| <b>eGFR subgroups<sup>c</sup></b>            |                  |           |                   |                          |                           |          |                   |                          |
| Number of participants                       | 427              | 429       |                   |                          | 427                       | 429      |                   |                          |
| ≥90 mL/min/1.73-m <sup>2</sup> (n=317)       | 4.0 (6)          | 10.1 (17) | 0.38 (0.15, 1.00) | 0.661                    | 0.13                      | 0.32     | 0.40 (0.14, 1.13) | 0.655                    |
| 60 to <90 mL/min/1.73-m <sup>2</sup> (n=433) | 6.3 (14)         | 14.6 (31) | 0.38 (0.20, 0.75) |                          | 0.25                      | 0.71     | 0.31 (0.14, 0.67) |                          |
| <60 mL/min/1.73-m <sup>2</sup> (n=106)       | 12.3 (7)         | 16.3 (8)  | 0.68 (0.22, 2.07) |                          | 0.61                      | 0.80     | 0.66 (0.16, 2.80) |                          |

<sup>a</sup>All confirmed <54 mg/dL (<3.0 mmol/L). <sup>b</sup>For one patient, BMI value was missing at baseline. <sup>c</sup>For 27 patients, eGFR values were missing at baseline.

ADA, American Diabetes Association; BIAsp, biphasic insulin aspart; CI confidence interval; eGFR, estimated glomerular filtration rate; FRC, fixed-ratio combination; iGlarLixi, FRC of insulin glargine 100 U/mL and the glucagon-like peptide-1 receptor agonist, lixisenatide; OR, odds ratio; RR, rate ratio.

Supplementary table 6. Incidence and rate of hypoglycaemia ADA Level 1<sup>a</sup> by baseline characteristics subgroups (safety population).

|                                              | Incidence, % (n) |            | OR (95% CI)       | Heterogeneity p-value | Rate per participant year |          | RR (95% CI)       | Heterogeneity p-value |
|----------------------------------------------|------------------|------------|-------------------|-----------------------|---------------------------|----------|-------------------|-----------------------|
|                                              | iGlarLixi        | BIAsp 30   |                   |                       | iGlarLixi                 | BIAsp 30 |                   |                       |
| <b>Age subgroups</b>                         |                  |            |                   |                       |                           |          |                   |                       |
| Number of participants                       | 442              | 441        |                   |                       | 442                       | 441      |                   |                       |
| <65 years (n=572)                            | 24.0 (67)        | 35.5 (104) | 0.57 (0.40, 0.82) | 0.711                 | 1.41                      | 2.27     | 0.65 (0.44, 0.98) | 0.726                 |
| ≥65 years (n=311)                            | 28.8 (47)        | 44.6 (66)  | 0.51 (0.32, 0.81) |                       | 3.13                      | 3.94     | 0.74 (0.44, 1.24) |                       |
| <b>Diabetes duration subgroups</b>           |                  |            |                   |                       |                           |          |                   |                       |
| Number of participants                       | 442              | 441        |                   |                       | 442                       | 441      |                   |                       |
| <10 years (n=303)                            | 19.7 (30)        | 30.5 (46)  | 0.56 (0.33, 0.95) | 0.953                 | 1.36                      | 1.95     | 0.76 (0.43, 1.33) | 0.819                 |
| ≥10 years (n=580)                            | 29.0 (84)        | 42.8 (124) | 0.55 (0.39, 0.77) |                       | 2.39                      | 3.27     | 0.70 (0.47, 1.03) |                       |
| <b>Basal insulin dose subgroups</b>          |                  |            |                   |                       |                           |          |                   |                       |
| Number of participants                       | 442              | 441        |                   |                       | 442                       | 441      |                   |                       |
| <30 U/day (n=313)                            | 26.1 (41)        | 32.7 (51)  | 0.73 (0.45, 1.19) | 0.176                 | 2.45                      | 3.00     | 0.87 (0.51, 1.49) | 0.354                 |
| ≥30 U/day (n=570)                            | 25.6 (73)        | 41.8 (119) | 0.48 (0.34, 0.68) |                       | 1.79                      | 2.73     | 0.64 (0.43, 0.95) |                       |
| <b>HbA1c subgroups</b>                       |                  |            |                   |                       |                           |          |                   |                       |
| Number of participants                       | 442              | 441        |                   |                       | 442                       | 441      |                   |                       |
| 7.5–8.0 % (n=238)                            | 27.1 (32)        | 35.0 (42)  | 0.69 (0.40, 1.20) | 0.594                 | 2.90                      | 2.57     | 1.16 (0.63, 2.14) | 0.171                 |
| >8.0–9.0 % (n=401)                           | 25.4 (49)        | 41.3 (86)  | 0.48 (0.31, 0.74) |                       | 1.70                      | 3.02     | 0.59 (0.36, 0.95) |                       |
| >9.0–10.0 % (n=244)                          | 25.2 (33)        | 37.2 (42)  | 0.57 (0.33, 0.99) |                       | 1.74                      | 2.74     | 0.57 (0.31, 1.06) |                       |
| <b>BMI subgroups<sup>b</sup></b>             |                  |            |                   |                       |                           |          |                   |                       |
| Number of participants                       | 441              | 441        |                   |                       | 441                       | 441      |                   |                       |
| <25 kg/m <sup>2</sup> (n=147)                | 39.1 (27)        | 47.4 (37)  | 0.70 (0.36, 1.36) | 0.419                 | 4.33                      | 4.60     | 0.85 (0.41, 1.77) | 0.368                 |
| 25–<30 kg/m <sup>2</sup> (n=344)             | 27.8 (50)        | 43.4 (71)  | 0.50 (0.32, 0.78) |                       | 1.95                      | 3.59     | 0.54 (0.33, 0.88) |                       |
| 30–<35 kg/m <sup>2</sup> (n=236)             | 16.8 (21)        | 33.3 (37)  | 0.40 (0.22, 0.74) |                       | 1.26                      | 1.28     | 1.09 (0.57, 2.07) |                       |
| ≥35 kg/m <sup>2</sup> (n=155)                | 23.9 (16)        | 28.4 (25)  | 0.81 (0.39, 1.69) |                       | 1.26                      | 1.73     | 0.79 (0.36, 1.73) |                       |
| <b>eGFR subgroups<sup>c</sup></b>            |                  |            |                   |                       |                           |          |                   |                       |
| Number of participants                       | 427              | 429        |                   |                       | 427                       | 429      |                   |                       |
| ≥90 mL/min/1.73-m <sup>2</sup> (n=317)       | 26.8 (40)        | 34.5 (58)  | 0.68 (0.42, 1.10) | 0.485                 | 1.75                      | 2.41     | 0.75 (0.44, 1.28) | 0.419                 |
| 60 to <90 mL/min/1.73-m <sup>2</sup> (n=433) | 24.0 (53)        | 39.6 (84)  | 0.49 (0.32, 0.74) |                       | 1.74                      | 3.06     | 0.57 (0.36, 0.91) |                       |
| <60 mL/min/1.73-m <sup>2</sup> (n=106)       | 28.1 (16)        | 46.9 (23)  | 0.43 (0.19, 0.96) |                       | 4.16                      | 3.61     | 1.10 (0.45, 2.73) |                       |

<sup>a</sup>All confirmed <70 mg/dL (<3.9 mmol/L) and ≥54 mg/dL (≥3.0 mmol/L). <sup>b</sup>For one patient, BMI value was missing at baseline. <sup>c</sup>For 27 patients, eGFR values were missing at baseline. ADA, American Diabetes Association; BIAsp, biphasic insulin aspart; CI confidence interval; eGFR, estimated glomerular filtration rate; FRC, fixed-ratio combination; iGlarLixi, FRC of insulin glargine 100 U/mL and the glucagon-like peptide-1 receptor agonist, lixisenatide; OR, odds ratio; RR, rate ratio.

Supplementary table 7. Proportion of participants reaching target HbA1c and composite endpoints by subgroups (ITT population).

| Baseline subgroup                      | Participants who reached HbA1c <7.0 % <sup>a</sup> |                   |                   |            | Participants who reached HbA1c <7.0 % without weight gain <sup>a</sup> |                   |                   |            | Participants who reached HbA1c <7.0 % without weight gain and without hypoglycaemia <sup>a</sup> |                   |                    |            |
|----------------------------------------|----------------------------------------------------|-------------------|-------------------|------------|------------------------------------------------------------------------|-------------------|-------------------|------------|--------------------------------------------------------------------------------------------------|-------------------|--------------------|------------|
|                                        | iGlarLixi<br>n (%)                                 | BIAsp 30<br>n (%) | OR<br>(95% CI)    | P<br>value | iGlarLixi<br>n (%)                                                     | BIAsp 30<br>n (%) | OR<br>(95% CI)    | P<br>value | iGlarLixi<br>n (%)                                                                               | BIAsp 30<br>n (%) | OR<br>(95% CI)     | P<br>value |
| <b>Age, years</b>                      |                                                    |                   |                   |            |                                                                        |                   |                   |            |                                                                                                  |                   |                    |            |
| <65                                    | 118 (42.3)                                         | 94 (32.0)         | 1.65 (1.16, 2.35) | 0.965      | 74 (26.5)                                                              | 34 (11.6)         | 2.94 (1.87, 4.63) | 0.764      | 56 (20.1)                                                                                        | 20 (6.8)          | 3.68 (2.13, 6.37)  | 0.635      |
| ≥65                                    | 69 (42.1)                                          | 47 (31.3)         | 1.67 (1.04, 2.70) |            | 48 (29.3)                                                              | 21 (14.0)         | 2.63 (1.47, 4.70) |            | 30 (18.3)                                                                                        | 11 (7.3)          | 2.95 (1.41, 6.17)  |            |
| <b>Diabetes duration, years</b>        |                                                    |                   |                   |            |                                                                        |                   |                   |            |                                                                                                  |                   |                    |            |
| <10                                    | 72 (47.1)                                          | 56 (36.8)         | 1.63 (1.02, 2.61) | 0.929      | 43 (28.1)                                                              | 21 (13.8)         | 2.62 (1.45, 4.73) | 0.754      | 35 (22.9)                                                                                        | 12 (7.9)          | 3.79 (1.86, 7.71)  | 0.706      |
| ≥10                                    | 115 (39.7)                                         | 85 (29.1)         | 1.67 (1.17, 2.38) |            | 79 (27.2)                                                              | 34 (11.6)         | 2.95 (1.89, 4.62) |            | 51 (17.6)                                                                                        | 19 (6.5)          | 3.18 (1.82, 5.57)  |            |
| <b>Basal insulin dose, U/day</b>       |                                                    |                   |                   |            |                                                                        |                   |                   |            |                                                                                                  |                   |                    |            |
| <30                                    | 61 (38.6)                                          | 49 (31.0)         | 1.49 (0.92, 2.40) | 0.596      | 45 (28.5)                                                              | 21 (13.3)         | 2.76 (1.54, 4.96) | 0.923      | 32 (20.3)                                                                                        | 14 (8.9)          | 2.77 (1.40, 5.48)  | 0.436      |
| ≥30                                    | 126 (44.2)                                         | 92 (32.2)         | 1.75 (1.23, 2.48) |            | 77 (27.0)                                                              | 34 (11.9)         | 2.87 (1.83, 4.50) |            | 54 (18.9)                                                                                        | 17 (5.9)          | 3.95 (2.21, 7.05)  |            |
| <b>HbA1c, %</b>                        |                                                    |                   |                   |            |                                                                        |                   |                   |            |                                                                                                  |                   |                    |            |
| 7.5–8.0<br>(58–64 mmol/mol)            | 60 (50.8)                                          | 57 (47.5)         | 1.13 (0.68, 1.88) | 0.194      | 45 (38.1)                                                              | 26 (21.7)         | 2.21 (1.24, 3.93) | 0.566      | 30 (25.4)                                                                                        | 14 (11.7)         | 2.72 (1.35, 5.50)  | 0.655      |
| >8.0–9.0<br>(>64–75 mmol/mol)          | 91 (47.2)                                          | 64 (30.5)         | 2.06 (1.37, 3.11) |            | 53 (27.5)                                                              | 22 (10.5)         | 3.27 (1.90, 5.63) |            | 40 (20.7)                                                                                        | 14 (6.7)          | 3.69 (1.93, 7.04)  |            |
| >9.0–10.0<br>(>75–86 mmol/mol)         | 36 (27.3)                                          | 20 (17.5)         | 1.77 (0.96, 3.29) |            | 24 (18.2)                                                              | 7 (6.1)           | 3.39 (1.40, 8.20) |            | 16 (12.1)                                                                                        | 3 (2.6)           | 5.11 (1.45, 18.04) |            |
| <b>BMI, kg/m<sup>2</sup></b>           |                                                    |                   |                   |            |                                                                        |                   |                   |            |                                                                                                  |                   |                    |            |
| <25                                    | 24 (34.3)                                          | 23 (29.5)         | 1.20 (0.59, 2.44) | 0.675      | 16 (22.9)                                                              | 6 (7.7)           | 3.54 (1.28, 9.74) | 0.585      | 8 (11.4)                                                                                         | 4 (5.1)           | 2.34 (0.67, 8.21)  | 0.626      |
| 25–<30                                 | 80 (44.4)                                          | 52 (31.5)         | 1.92 (1.22, 3.03) |            | 51 (28.3)                                                              | 23 (13.9)         | 2.68 (1.54, 4.68) |            | 35 (19.4)                                                                                        | 12 (7.3)          | 3.33 (1.65, 6.70)  |            |
| 30–<35                                 | 55 (44.0)                                          | 36 (32.1)         | 1.80 (1.04, 3.11) |            | 37 (29.6)                                                              | 12 (10.7)         | 3.80 (1.84, 7.83) |            | 30 (24.0)                                                                                        | 7 (6.3)           | 5.18 (2.15, 12.46) |            |
| ≥35                                    | 28 (41.8)                                          | 30 (33.7)         | 1.40 (0.71, 2.75) |            | 18 (26.9)                                                              | 14 (15.7)         | 1.83 (0.83, 4.12) |            | 13 (19.4)                                                                                        | 8 (9.0)           | 2.38 (0.91, 6.21)  |            |
| <b>eGFR, mL/min/1.73-m<sup>2</sup></b> |                                                    |                   |                   |            |                                                                        |                   |                   |            |                                                                                                  |                   |                    |            |
| ≥90                                    | 62 (41.3)                                          | 52 (31.0)         | 1.59 (0.99, 2.55) | 0.692      | 34 (22.7)                                                              | 15 (8.9)          | 3.10 (1.59, 6.01) | 0.919      | 23 (15.3)                                                                                        | 11 (6.5)          | 2.78 (1.29, 5.99)  | 0.850      |
| 60 to <90                              | 96 (43.4)                                          | 71 (33.0)         | 1.75 (1.17, 2.62) |            | 64 (29.0)                                                              | 31 (14.4)         | 2.62 (1.61, 4.27) |            | 48 (21.7)                                                                                        | 16 (7.4)          | 3.69 (2.00, 6.78)  |            |
| <60                                    | 24 (42.1)                                          | 18 (36.7)         | 1.18 (0.53, 2.64) |            | 21 (36.8)                                                              | 9 (18.4)          | 2.63 (1.05, 6.60) |            | 12 (21.1)                                                                                        | 4 (8.2)           | 3.11 (0.92, 10.51) |            |

<sup>a</sup>Logistic regression model adjusting for treatment groups, randomization strata at screening visit, subgroup and subgroup-by-treatment group interaction, as well as fixed continuous covariates of baseline values of HbA<sub>1c</sub>. Imputed as not reaching target (non-responder) in case of missing Week 26 HbA<sub>1c</sub> values.

BIAsp, biphasic insulin aspart; BMI, body mass index; CI, confidence interval; eGFR, estimated glomerular filtration rate; iGlarLixi, fixed-ratio combination of insulin glargine 100 U/mL and the glucagon-like peptide-1 receptor agonist, lixisenatide; ITT, intent to treat; OR, odds ratio.
